# Supplementary material
Source: Springer Nature journal article supplement (https://www.springermedizin.de/resource/supplementary/12990_2009_249_MOESM3_ESM.pdf/9612884)

NF-M

NF-H

Control

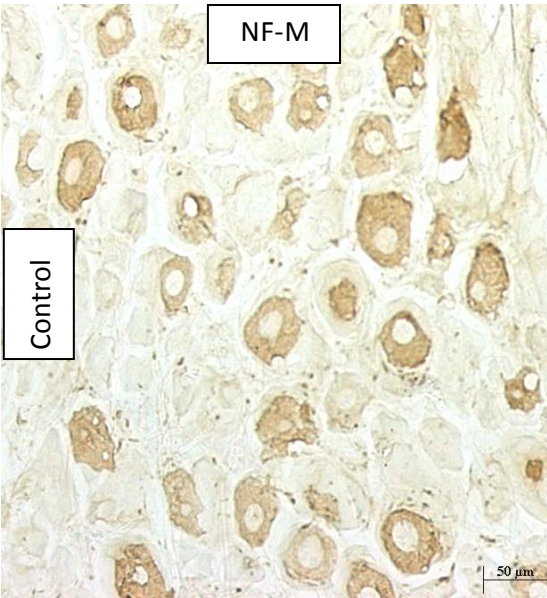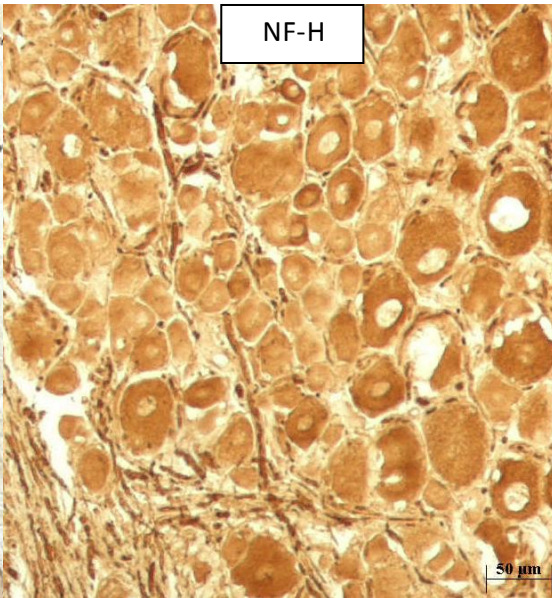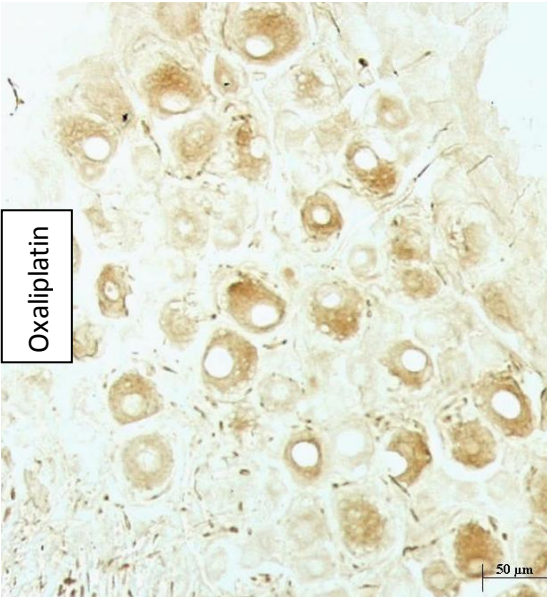

Oxaliplatin

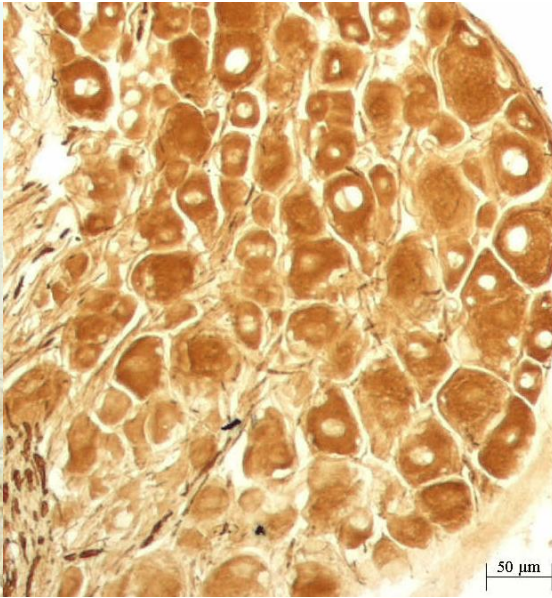

Supplement: MOESM3 [file 9612884]
